# Supplementary material
Source: Springer Nature journal article supplement (https://www.springermedizin.de/resource/supplementary/13026_2006_7_MOESM4_ESM.pdf/9644458)

# Strategic Advantage

Perceived Uniqueness

Low Cost

**Strategic Target Market**

Industry-Wide

**Differentiation**

**Cost  
Leadership**

“Focused  
Differentiation”

Segment  
(Primary Care)

**Focus**

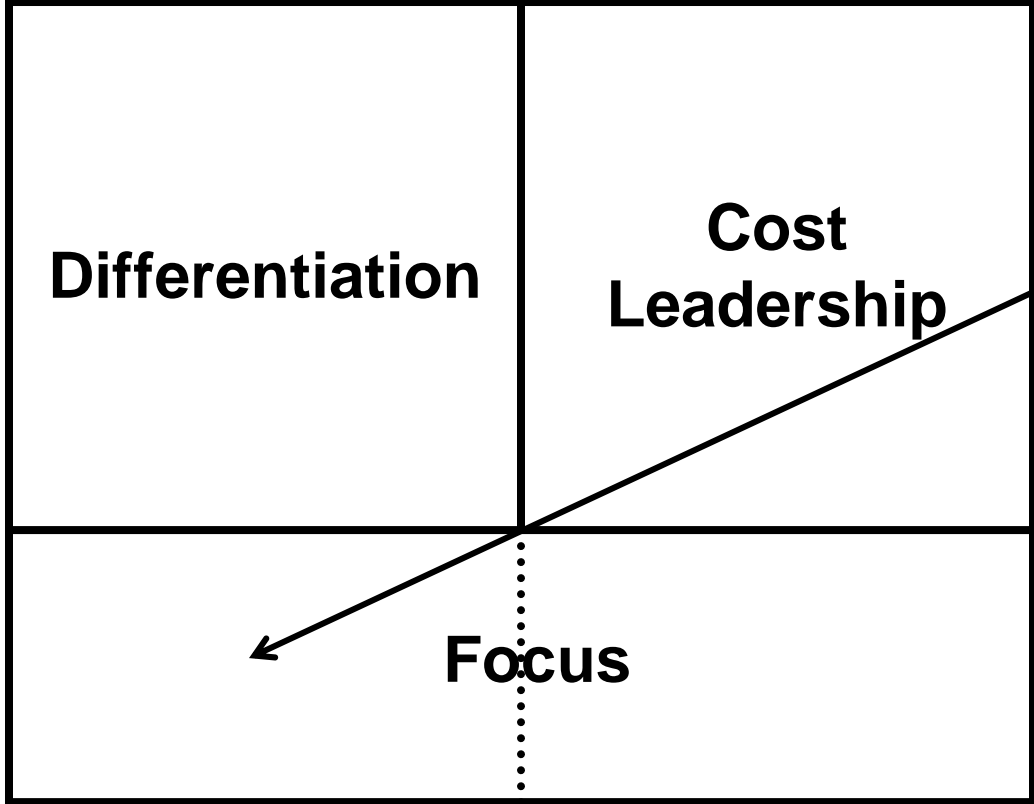

Supplement: MOESM4 [file 9644458]
